# Supplementary material for: Duodenal bacterial proteolytic activity determines sensitivity to dietary antigen through protease-activated receptor-2
Source: PubMed Central journal article supplement (PMC6416356; doi:10.1038/s41467-019-09037-9), 2019-03-13
Supplement: 41467_2019_9037_MOESM1_ESM.pdf [file 41467_2019_9037_MOESM1_ESM.pdf]

Supplemental Information for:

**Duodenal bacterial proteolytic activity determines sensitivity to dietary antigen through protease-activated receptor-2**

Camintero *et al*

This PDF includes:

Supplementary Tables 1-4

Supplementary Figures 1-8

## **Supplementary Tables**

| <b>Diagnosis</b> | <b>Average age</b> | <b>Sex (% of females)</b> |
|------------------|--------------------|---------------------------|
| Controls         | 47 (30-72)         | 75 %                      |
| Celiac disease   | 42.3 (18-64)       | 61.5 %                    |

**Supplementary Table 1.** Demographics of controls and celiac disease patients recruited for duodenal biopsies and aspirates.

| Strain or vector                                         | Relevant characteristic- genotype                                                                                                                                       | Source              |
|----------------------------------------------------------|-------------------------------------------------------------------------------------------------------------------------------------------------------------------------|---------------------|
| <b>Strain</b>                                            |                                                                                                                                                                         |                     |
| <i>Pseudomonas aeruginosa</i> PA14                       | Laboratory wild-type strain; Burn patient isolate.                                                                                                                      | 1                   |
| <i>Pseudomonas aeruginosa</i> PA14 <i>lasB::MAR2xT7</i>  | Transposon mutant in <i>lasB</i> gene.                                                                                                                                  | 1                   |
| <i>Pseudomonas aeruginosa</i> PA14 <i>plasB-luxCDABE</i> | PA14 with integrated <i>plasB-luxCDABE</i> transcriptional reporter at the CTX integration site.                                                                        | This study          |
| <i>Pseudomonas aeruginosa</i> X46.1                      | Clinical isolate from the small intestine of a celiac disease patient.                                                                                                  | 2                   |
| NEB 5-alpha competent <i>Escherichia coli</i>            | Chemically competent <i>E. coli</i> strain suitable for high efficiency transformation. Derivative of the <i>E.coli</i> DH5α strain.                                    | New England Biolabs |
| <i>Escherichia coli</i> HB101                            | Competent <i>E.coli</i> strains. genotype: F- mcrB mrr hsdS20(rB - mB - ) recA13 leuB6 ara-14 proA2 lacY1 galK2 xyl-5 mtl-1 rpsL20(SmR) glnV44 λ                        | Lab collection      |
| <b>Vector</b>                                            |                                                                                                                                                                         |                     |
| pCDS108                                                  | Promoter of <i>lasB</i> fused to <i>luxCDABE</i> ( <i>plasB-luxCDABE</i> ) on a vector suitable for genome integration at the CTX site                                  | 3                   |
| pRK2013                                                  | Mobilizing vector, ColE1 Tra (RK2); Km <sup>R</sup>                                                                                                                     | 4                   |
| pHERD26T                                                 | Broad-host range shuttle vector, Tet <sup>R</sup>                                                                                                                       | 5                   |
| <i>pHERD26T-lasBEnd</i>                                  | pHERD26T with 2.1 bp fragment containing <i>lasB</i> and its native promoter.                                                                                           | This study          |
| <i>pHERD26T-lasBAra</i>                                  | pHERD26T with 2.1 bp fragment containing <i>lasB</i> under the control of the arabinose inducible promoter.                                                             | This study          |
| <i>Nluc-hPAR2-eYFP</i>                                   | Detection of N-terminal PAR-2 cleavage. NanoLuc luciferase reporter tag was cloned in frame with the human PAR2 cDNA and its stop codon was mutated to insert eYFP tag. | 6                   |

Tet, tetracycline; Kanamycin, Km

**Supplementary Table 2.** Bacterial strains and vectors used in the study.

| <b>Primer</b> | <b>Sequence</b>                                                   | <b>Function</b>                                                     | <b>Origin</b>                     |
|---------------|-------------------------------------------------------------------|---------------------------------------------------------------------|-----------------------------------|
| lasB F-end    | 5'-<br>GTCGACTCTAGAGGATCCCCT<br>GGCCCCTCGCTGAGCGC-3'              | Cloning of LasB                                                     | Integrated<br>DNA<br>Technologies |
| lasB R-end    | 5'-<br>AGAATTCGAGCTCGGTACCCC<br>TGGCGGAAGACGGCTTGAGC-<br>3'       | Cloning of LasB                                                     | Integrated<br>DNA<br>Technologies |
| lasB F-ara    | 5'-<br>AGAATTCGAGCTCGGTACCCC<br>AGGAGAACTGAACAAGATGAA<br>GAAGG-3' | Cloning of LasB                                                     | Integrated<br>DNA<br>Technologies |
| lasBR-ara     | 5'-<br>GTCGACTCTAGAGGATCCCCT<br>TACAACGCGCTCGGGCA-3'              | Cloning of LasB                                                     | Integrated<br>DNA<br>Technologies |
| pHERD26TgF    | 5'-<br>GGGATCCTCTAGAGTCGAC-<br>3'                                 | Amplification of<br>pHERD26T vector<br>backbone for cloning<br>LasB | Integrated<br>DNA<br>Technologies |
| pHERD26TgR    | 5'-<br>GGGTACCGAGCTCGAATTCTT<br>ATCAGATC-3'                       | Amplification of<br>pHERD26T vector<br>backbone for cloning<br>LasB | Integrated<br>DNA<br>Technologies |
| EUB338        | 5'-GCTGCCTCCCGTAGGAGT-3'<br>(5' end-labeled with Cy3)             | Detection of<br>bacterial DNA by<br>16S-FISH technique              | Integrated<br>DNA<br>Technologies |
| 341F          | 5'-CCTACGGGAGGCAGCAG-3'                                           | Microbiota<br>sequencing for<br>Illumina                            | Life<br>Technologies              |
| 518R          | 5'-GTATTACCGCGGCTGCTGG-<br>3'                                     | Microbiota<br>sequencing for<br>Illumina                            | Life<br>Technologies              |

**Supplementary Table 3:** Primers used in the study.

| <b>Antibody</b>                         | <b>Function</b>                                                         | <b>Dilution</b> | <b>Origin</b>                     |
|-----------------------------------------|-------------------------------------------------------------------------|-----------------|-----------------------------------|
| Rabbit anti-human antibody to CD3       | Primary antibody for staining of CD3 by IHC                             | 1:2000          | Dako- GA50361-2                   |
| HRP-conjugated anti-mouse IgG           | Secondary antibody for anti-gliadin antibody determination              | 1:2000          | GE Healthcare- NA931              |
| HRP-conjugated anti-mouse IgA           | Secondary antibody for anti-gliadin antibody determination              | 1:2000          | Abcam- ab97235                    |
| Rabbit polyclonal antibody PAR-2 (H-99) | Primary antibody for detection of PAR-2 by IHC                          | 1:500           | Santa Cruz Biotechnology sc-57797 |
| Alexa Fluor 594 goat anti-rabbit IgG    | Secondary antibody                                                      | 1:2000          | Life Technologies A11037          |
| CD45-BV421 (30-F11)                     | Fluorochrome-labeled cell-surface antibody for cytometry analysis.      | 1:100           | BioLegend-103133                  |
| CD3ε-PE-dazzle 594 (145-2C11)           | Fluorochrome-labeled cell-surface antibody for flow cytometry analysis. | 1:100           | BioLegend-100348                  |
| CD103-PE (3E7)                          | Fluorochrome-labeled cell-surface antibody for flow cytometry analysis. | 1:100           | BioLegend-121405                  |

HRP, horseradish peroxidase; IHC, immunohistochemistry

**Supplementary Table 4:** Antibodies used in the study.

## Supplementary Figures

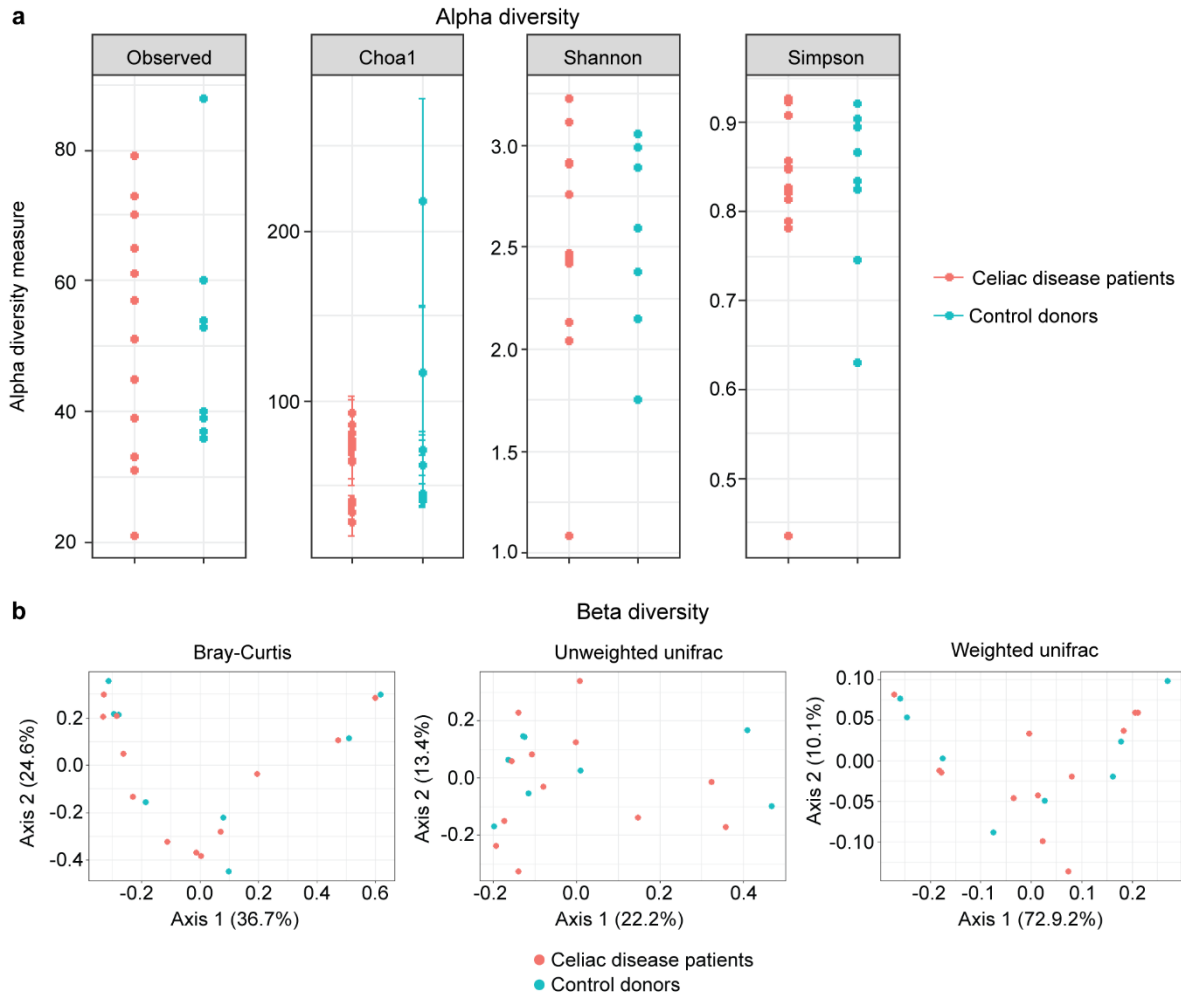

**Supplementary Figure 1.** No difference in alpha or beta diversity in CeD and control donors. **a.** Alpha-diversity of microbiota profiles in duodenal biopsies from patients with CeD (n=12) and without CeD (n=8) measured as Observed species, Chao1, Shannon, and Simpson index. **b.** Beta-diversity of microbiota profiles from duodenal biopsies of patients with CeD (n=12) and without CeD (n=8), using Bray-Curtis dissimilarity and Unifrac (weighted and unweighted) represented as principal coordinates. Each dot represents an individual human donor.

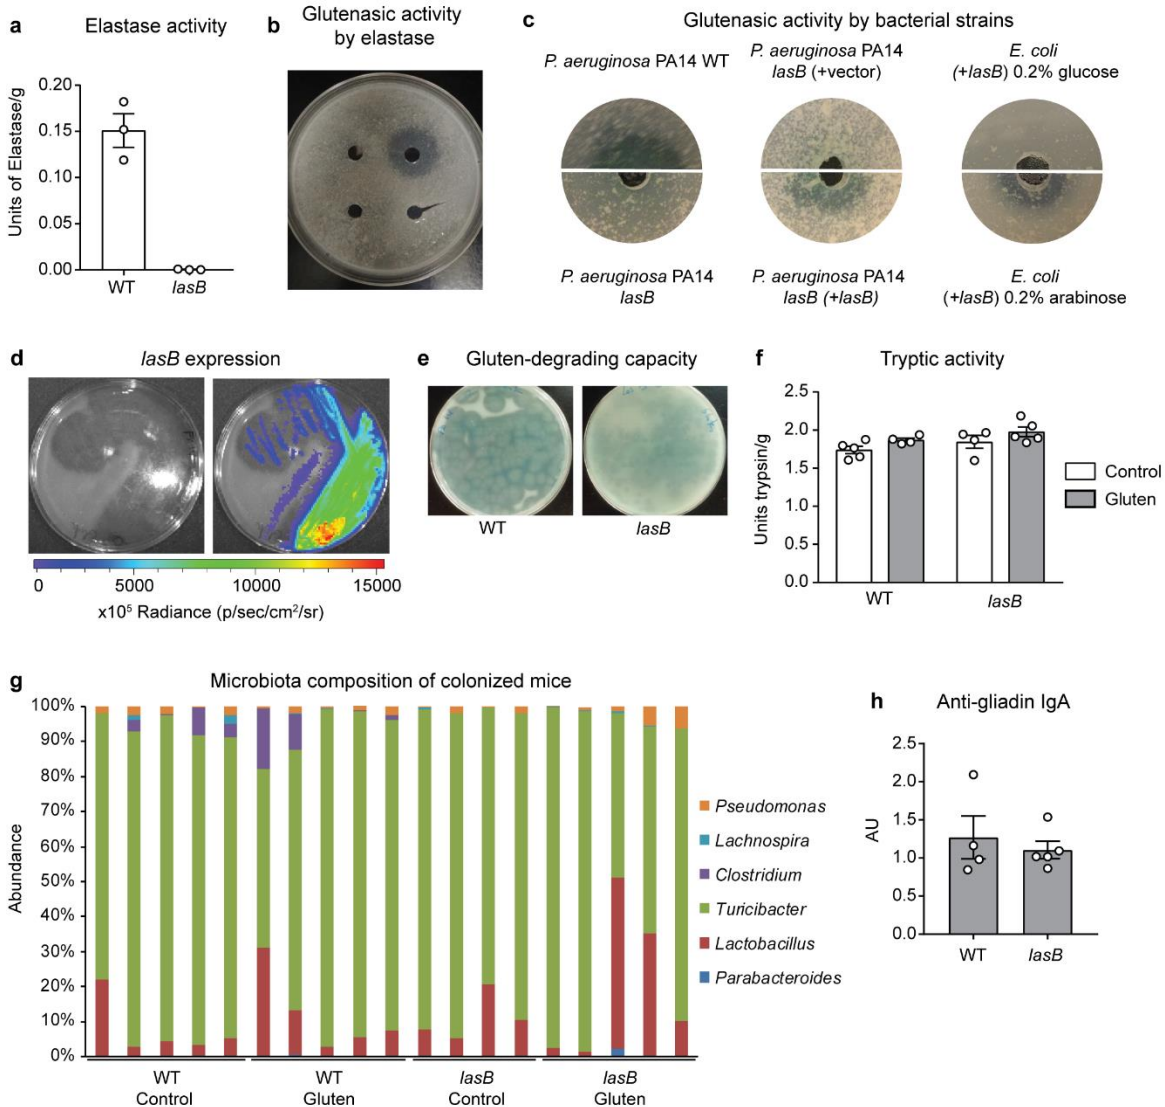

**Supplementary Figure 2.** LasB is expressed *in vivo* and degrades gluten. **a.** Elastase activity of *P. aeruginosa* PA14 WT (n=3) and its *lasB* mutant (n=3). Data is presented as mean  $\pm$  s.e.m where each dot represents an individual biological replicate. **b.** Glutenasic activity of commercial LasB elastase. One representative bioassay is shown from 3 independent experiments. **c.** Glutenasic activity measured in different bacterial strains with and without *lasB* gene expression. *P. aeruginosa* PA14 WT and its mutant *lasB* are shown in the left panel. *P. aeruginosa* PA14 *lasB* with empty vector *pHERD26T* (+vector) or with vector *pHERD26T* complemented with *lasB* under the *P. aeruginosa* PA14 *lasB* endogenous promoter (+*lasB*) are shown in the center panel. NEB 5-alpha competent *E. coli* strain with vector *pHERD26T* complemented with *lasB* under the arabinose promoter, repressed by the addition of glucose (+*lasB* 0.2% glucose) or induced by the addition of arabinose (+*lasB* 0.2% arabinose) are shown in the right panel. Representative bioassays are shown from 3 independent experiments. **d.** Luminescence linked to expression of *lasB* corresponding with degradation of gluten by *P. aeruginosa* PA14 harboring a *lasB-luxCDABE* transcriptional reporter at the CTX integration site. One representative image is shown from 3 biological replicates. **e.** Degradation

of gluten by *P. aeruginosa* PA14 WT and the *lasB* mutant strains *in vitro* recovered from the small intestine of clean SPF C57BL/6 mice. Representative images are shown from 5 mice. **f.** Tryptic activity measured in the small intestine of clean SPF C57BL/6 mice colonized with *P. aeruginosa* PA14 WT or the *lasB* mutant, treated with gluten (grey bars; n=4 WT, n=4 *lasB*) or without gluten (controls, white bars; n=5 WT, n=4 *lasB*). Data presented as mean  $\pm$  s.e.m. where each dot represents an individual mouse. **g.** Small intestinal microbiota composition, expressed as relative abundance, at the genus level in clean-SPF C57BL/6 mice colonized with *P. aeruginosa* PA14 WT or the *lasB* mutant treated with gluten (n=5 WT, n=5 *lasB*) or without gluten (controls; n=5 WT, n=4 *lasB*). **h.** Anti-gliadin IgA antibody titers in small intestinal washes of clean-SPF C57BL/6 mice colonized with *P. aeruginosa* PA14 WT or the *lasB* mutant and treated with gluten (n=4 WT, n=4 *lasB*). Data presented as mean  $\pm$  s.e.m. where each dot represents an individual mouse.



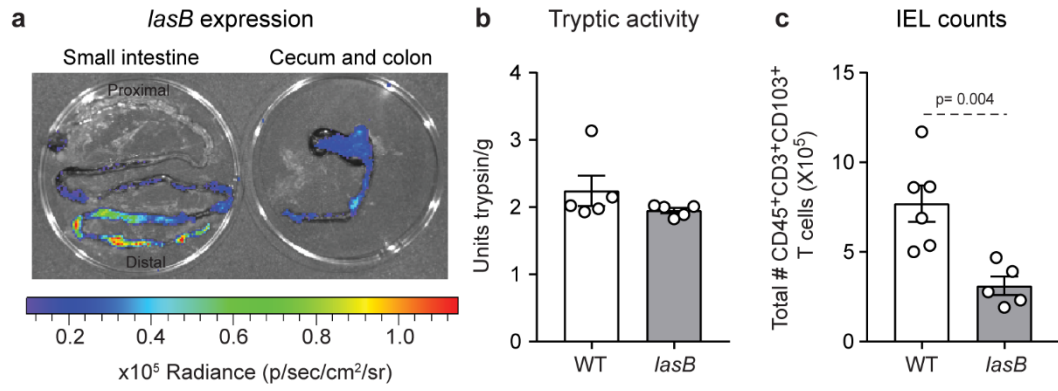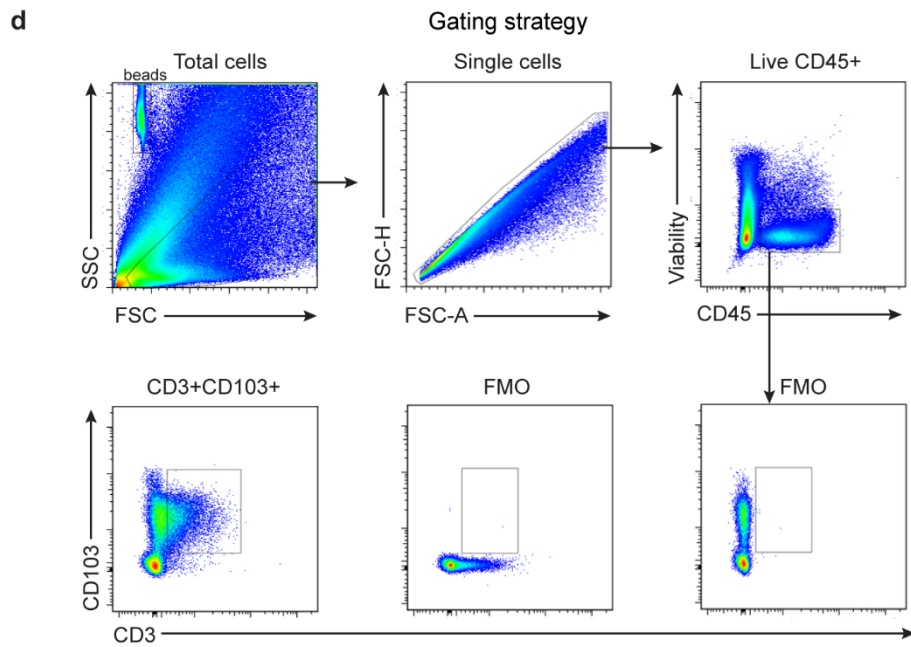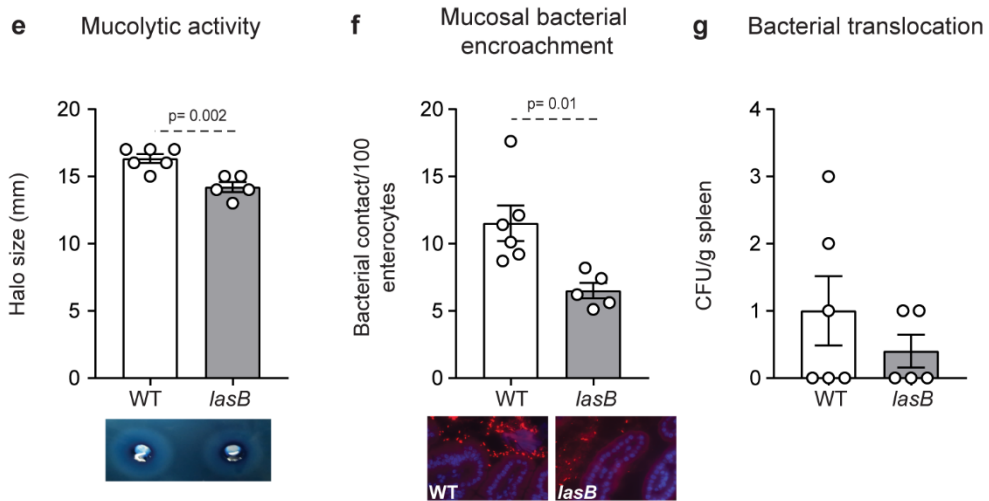

**Supplementary Figure 3.** LasB induces a pro-inflammatory response *in vivo* in the absence of microbiota. **a.** Visual expression of *lasB* in the small intestine (left panel) and large intestine (right panel) of C57BL/6 mice monocolonized with *P. aeruginosa* PA14 harboring a *lasB-luxCDABE* transcriptional reporter, which allows direct monitoring of the *lasB* promoter activity via the detection of light (n=3). Representative images are shown. **b.** Tryptic activity measured in the small intestine of ex-germ free C57BL/6 mice monocolonized with *P. aeruginosa* PA14 WT (n=5) or the *lasB* mutant (n=5). **c.** Total number of CD45+CD3+CD103+ cell population in the isolated small intestinal intraepithelial lymphocyte (IEL) compartment in C57BL/6 mice monocolonized with *P. aeruginosa* PA14 WT (n=6) or the *lasB* mutant (n=5). **d.** Gating strategy for determination of CD45+CD3+CD103+ IELs. CD3+CD103+ cells were determined from single cells gated on live CD45+ cells. Total cell counts were determined using counting beads. **e.** Luminal small intestinal mucolytic activity in mice monocolonized with *P. aeruginosa* PA14 WT (n=6) or the *lasB* mutant (n=5). Representative bioassays are shown. **f.** Quantitative measurement of bacterial-epithelial contact, by 16S-fluorescence *in situ* hybridization (FISH), in the small intestinal mucosa of mice monocolonized with *P. aeruginosa* PA14 WT (n=6) or the *lasB* mutant (n=5). Representative stained small intestinal sections are shown. **g.** Translocation of live bacteria to the spleen in C57BL/6 mice monocolonized with *P. aeruginosa* PA14 WT (n=6) or the *lasB* mutant (n=5). In panels b, c, e and f data presented as mean  $\pm$  s.e.m. where each dot represents an individual mouse. Displayed p values calculated by Student's t-test.

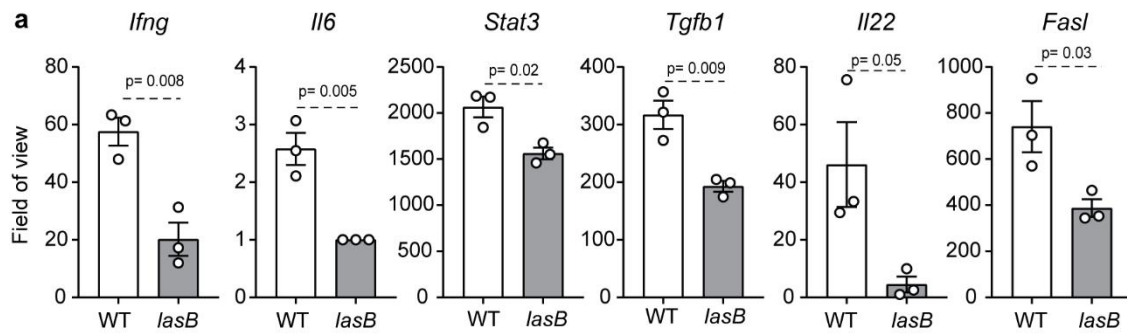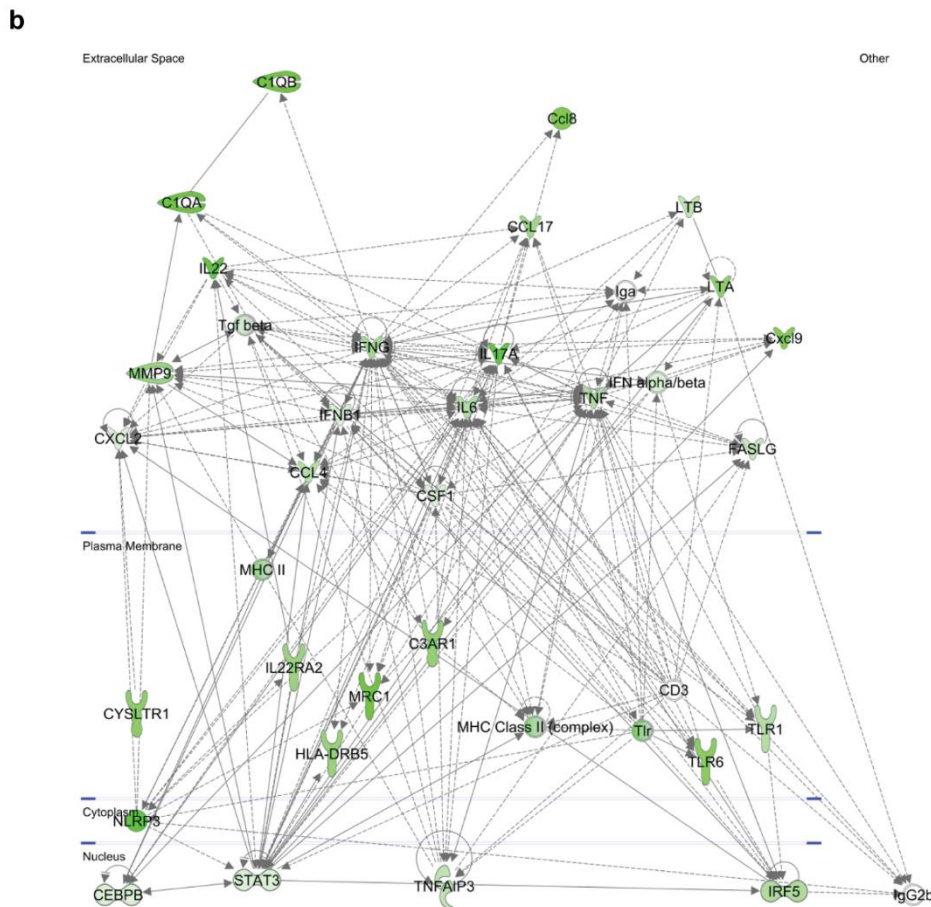

**Supplementary Figure 4.** *LasB* induces a pro-inflammatory gene signature in the IEL compartment. **a.** Gene expression in the IEL compartment of the small intestine of mice colonized with *P. aeruginosa* PA14 WT (n=3) or the *lasB* mutant (n=3), assessed by NanoString nCounter gene expression. Data presented as mean  $\pm$  s.e.m. where each dot represents an individual mouse. Displayed p values calculated by Student's t-test. **b.** Canonical pathways dysregulated in C57BL/6 mice monocolonized with *P. aeruginosa* PA14 WT or the *lasB* mutant, generated by Ingenuity Pathway Analysis (IPA) software based on downregulated (green) genes in the IEL compartment of *lasB*-colonized mice.

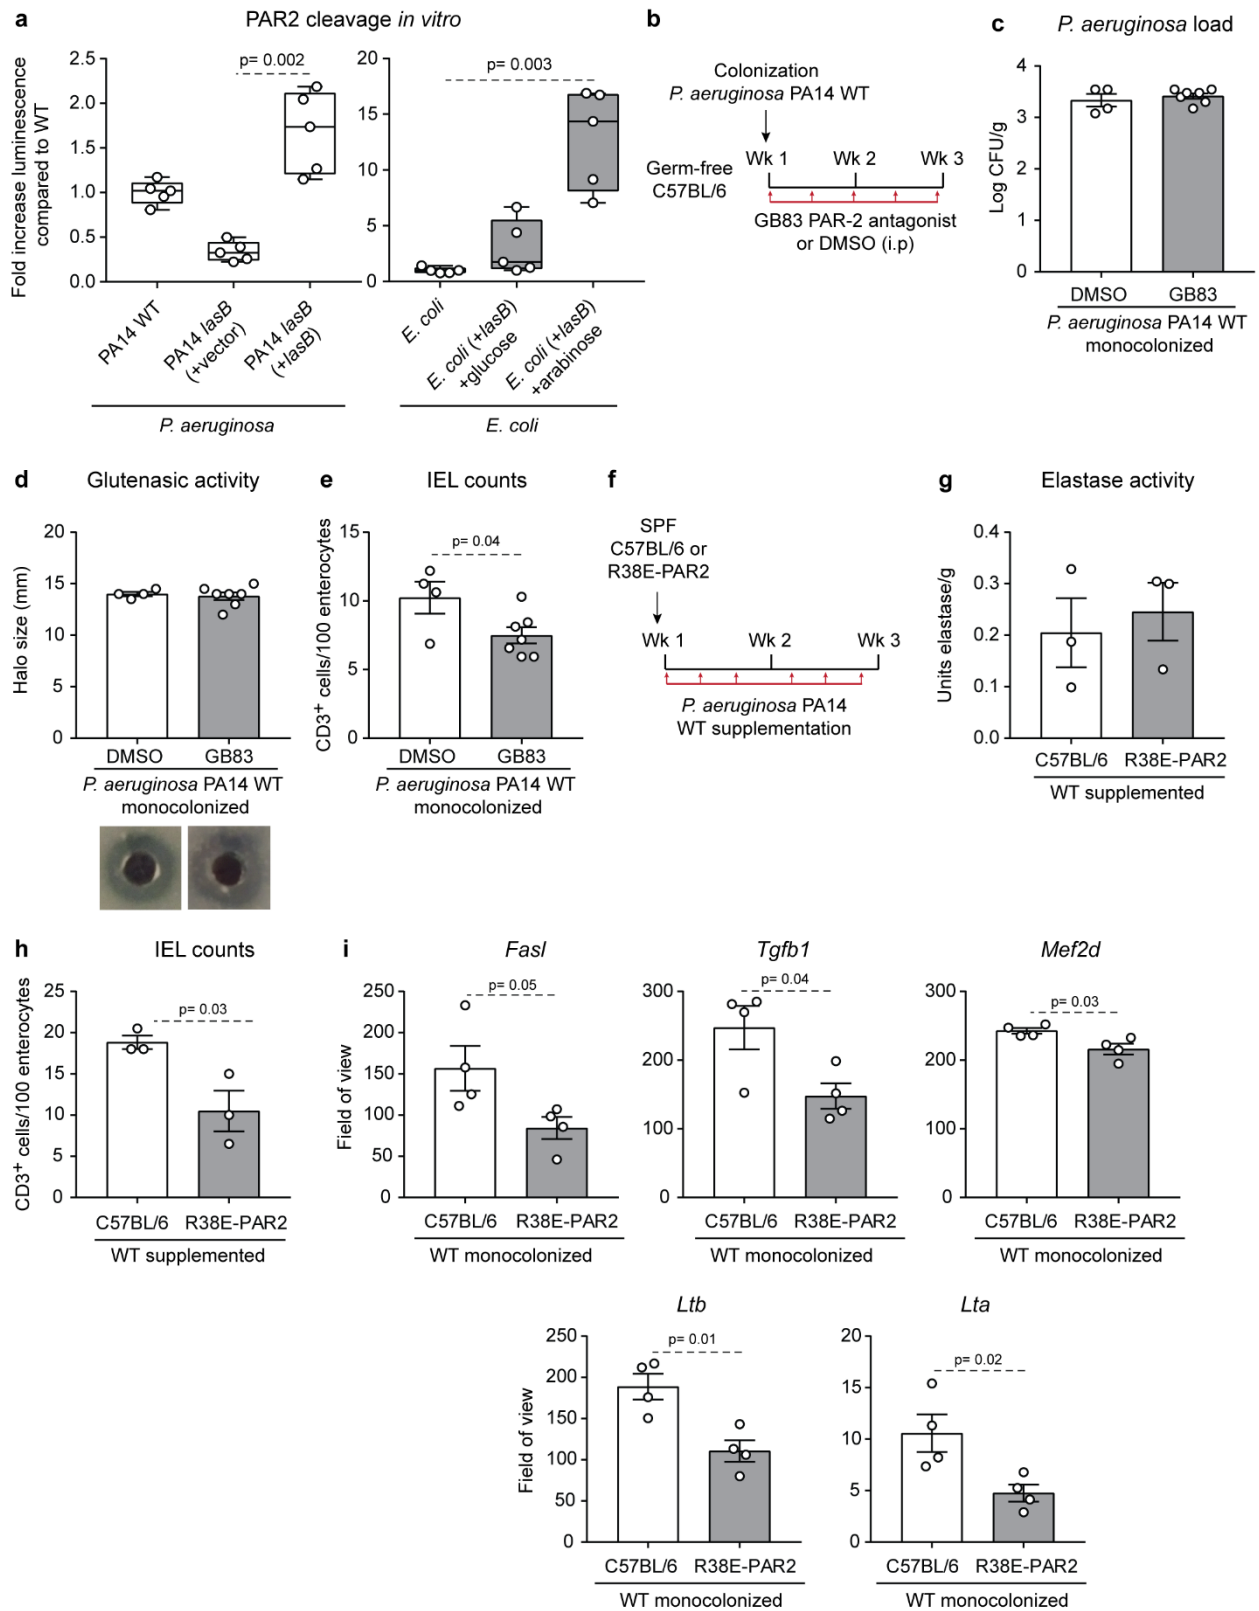

**Supplementary Figure 5.** LasB induces a pro-inflammatory response through PAR-2. **a.** *In vitro* cleavage of the external domain of PAR-2 by *P. aeruginosa* PA14 WT, *P. aeruginosa lasB*, *P. aeruginosa lasB* mutants complemented with an empty *pHERD26T* plasmid (+vector) or with the complemented *lasB*-expressing *pHERD26T* plasmid (+*lasB*) and NEB 5-alpha competent *E. coli* strains with vector *pHERD26T* complemented with *lasB* under the arabinose promoter, repressed by the addition of glucose (+glucose) or induced by the addition of arabinose (+arabinose) (n=5/group). Data presented as median with interquartile range and whiskers extending from minimum to maximum, which each dot representing a biological replicate. Displayed p values calculated by Kruskal-Wallis with Dunn's post-hoc test. Results are shown as fold increase of luminescence intensity obtained after PAR2 cleavage compared to *P. aeruginosa* PA14 WT or *E. coli* WT. **b.** Protocol for treatment of *P. aeruginosa* PA14 WT-monocolonized mice with GB83 PAR-2 antagonist or DMSO. **c.** *P. aeruginosa* bacterial load in the small intestine of C57BL/6 mice monocolonized with *P. aeruginosa* PA14 WT treated with GB83 PAR-2 antagonist (n=7) or DMSO (n=4). **d.** Small intestinal glutenase activity from C57BL/6 mice monocolonized with *P. aeruginosa* PA14 WT treated with GB83 PAR-2 antagonist (n=7) or DMSO (n=4). Representative bioassays are shown. **e.** Quantitative measure of IELs/100 enterocytes in small intestinal villi tips of C57BL/6 mice monocolonized with *P. aeruginosa* PA14 WT treated with GB83 PAR-2 antagonist (n=7) or DMSO (n=4). **f.** Protocol for the supplementation of SPF C57BL/6 and protease-resistant PAR-2 mutant mice (PAR38E-PAR2) with *P. aeruginosa* PA14 WT. **g.** Luminal small intestinal elastase activity from SPF C57BL/6 mice (n=3) and protease-resistant PAR-2 mutant mice (R38E-PAR2; n=3) supplemented with *P. aeruginosa* PA14 WT. **h.** Quantitative measure of IELs/100 enterocytes in small intestinal villi tips of SPF C57BL/6 mice (n=3) and R38E-PAR2 mice (n=3) supplemented with *P. aeruginosa* PA14 WT. **i.** Gene expression in the IEL compartment of the small intestine of ex-germ free C57BL/6 mice (n=4) and PAR38E-PAR2 mice (n=4) monocolonized with *P. aeruginosa* PA14 WT, assessed by NanoString nCounter gene expression. Data in panels c-e, g-i presented as mean  $\pm$  s.e.m. where each dot represents an individual mouse. Displayed p values calculated by Student's t-test.

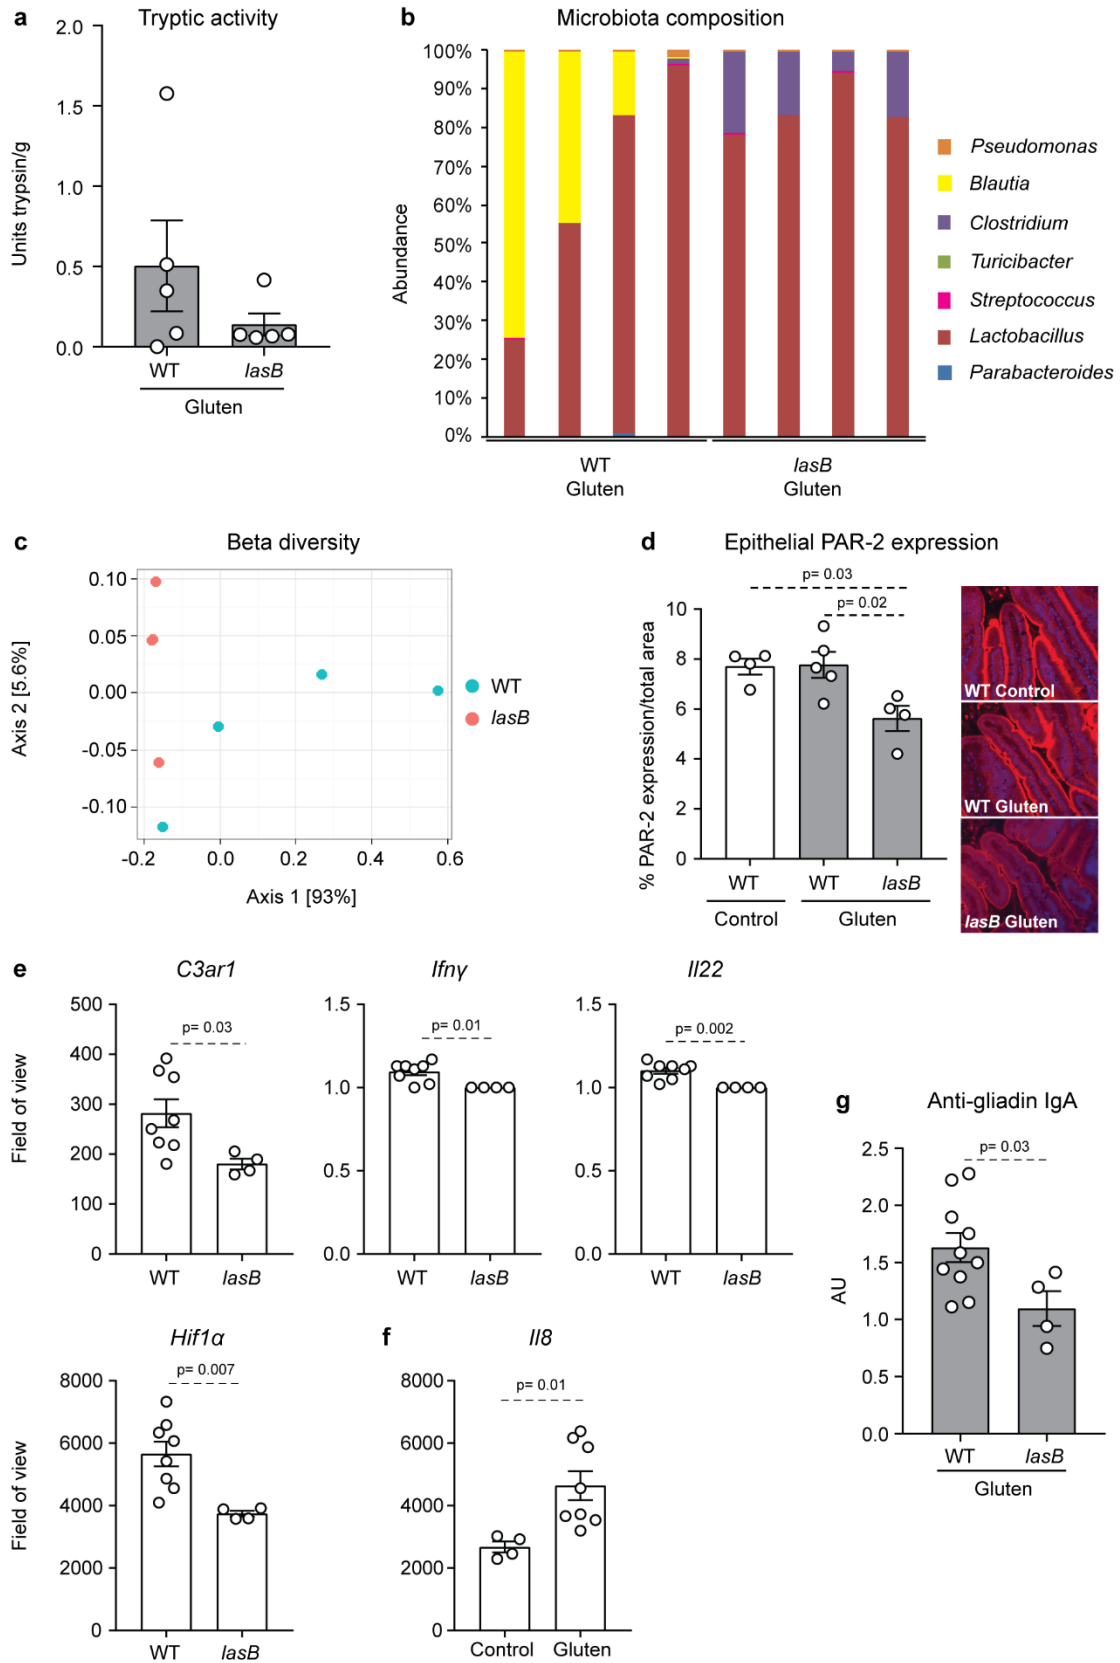

**Supplementary Figure 6.** LasB enhances gluten-induced pathology in NOD/DQ8 mice through gluten-independent mechanisms. **a.** Tryptic activity measured in the small intestine of clean SPF NOD/DQ8 mice colonized with *P. aeruginosa* PA14 WT (n=5) or the *lasB* mutant (n=5). **b.** Small intestinal microbiota composition at the genus level in clean SPF NOD/DQ8 mice colonized with *P. aeruginosa* PA14 WT (n=4) or the *lasB* mutant (n=4) and treated with gluten. **c.**  $\beta$ -diversity Bray Curtis dissimilarity PCoA plot of microbiota profiles from clean SPF NOD/DQ8 mice colonized with *P. aeruginosa* PA14 WT (n=4) or the *lasB* mutant (n=4). **d.** Immunostaining of PAR-2 in the small intestine of clean SPF NOD/DQ8 mice colonized with *P. aeruginosa* PA14 WT or the *lasB* mutant treated with gluten (n=5 WT, n=4 *lasB*) or without gluten (control; n=4 WT). **e.** Gene expression in whole small intestinal tissue of NOD/DQ8 mice colonized with *P. aeruginosa* PA14 WT or the *lasB* mutant, when comparisons were performed between *P. aeruginosa* PA14 WT (n=8) and *lasB* (n=4) colonized mice, assessed by NanoString nCounter Gene Expression CodeSets. **f.** Gene expression in whole small intestinal tissue of NOD/DQ8 mice colonized with *P. aeruginosa* PA14 WT or the *lasB* mutant, when comparisons were performed between gluten treated (n=8) and control mice (n=4), assessed by NanoString nCounter Gene Expression CodeSets. **g.** Anti-gliadin IgA antibodies in small intestinal washes of clean SPF NOD/DQ8 colonized mice with *P. aeruginosa* PA14 WT (n=10) or the *lasB* mutant (n=4) and treated with gluten. Data in panels a, d, e-g presented as mean  $\pm$  s.e.m where each dot represents an individual mouse. Displayed p values calculated by one-way ANOVA with a Tukey post-hoc test (d) or Student's t-test (a, e-g).

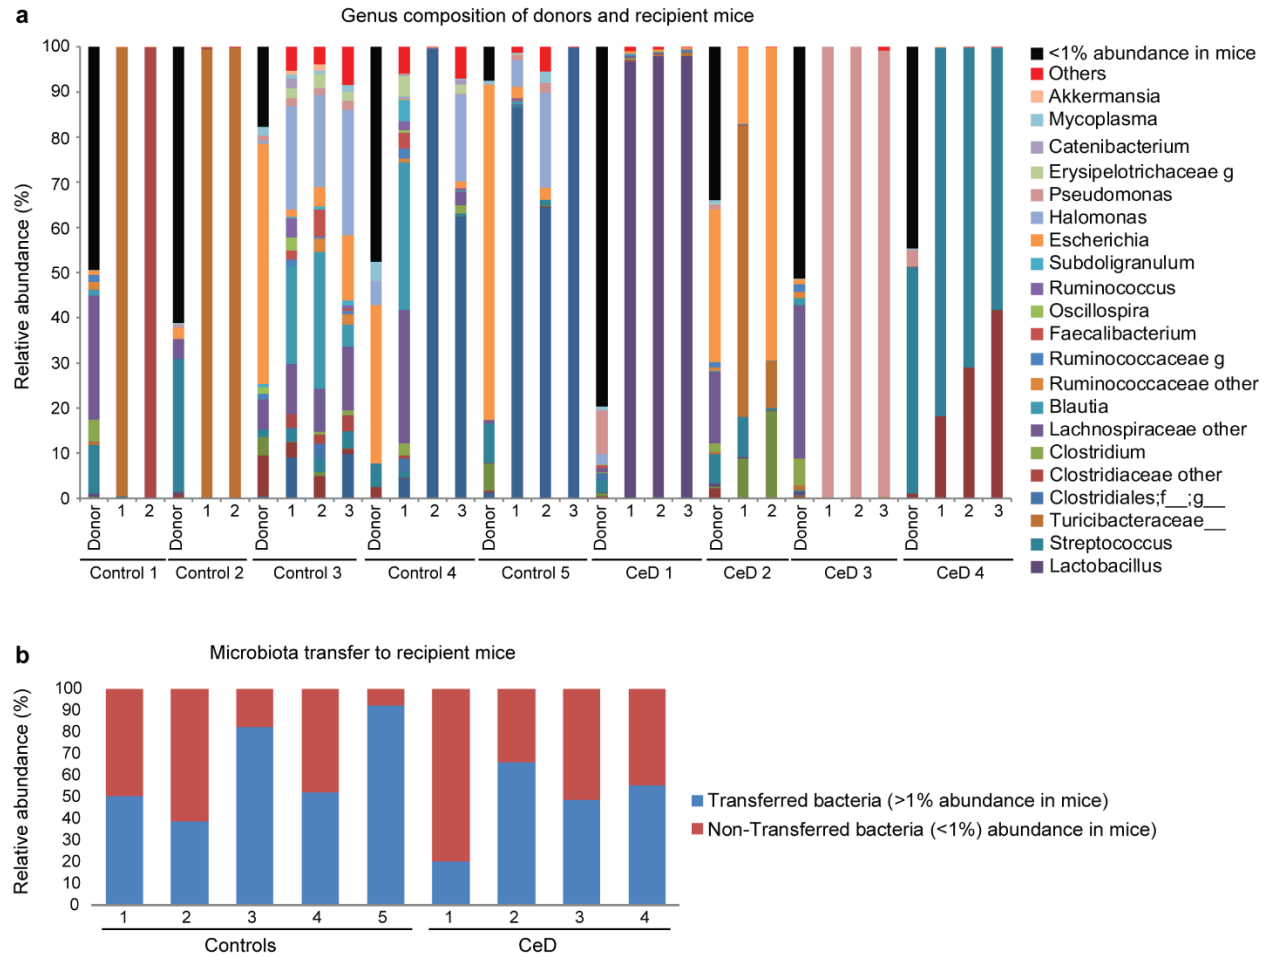

**Supplementary Figure 7.** Human small intestinal microbiota is transferred in ex-germ-free recipient mice. **a.** Microbial composition, at the genus level, of small intestinal contents from recipient mice colonized with human aspirates of patients with CeD (n=4 donors) and without CeD (controls; n=5 donors)) and from the corresponding duodenal biopsies of the donors used for mice colonization. Each donor was used to colonize 2-3 mice. Black bars represent those groups present in human duodenal biopsies not transferred to recipient mice and red bars represent those groups found at less than 1% of the relative abundance in mice. **b.** Percentage of microbiota transferred from the human aspirates of each donor to the small intestine of recipient mice.



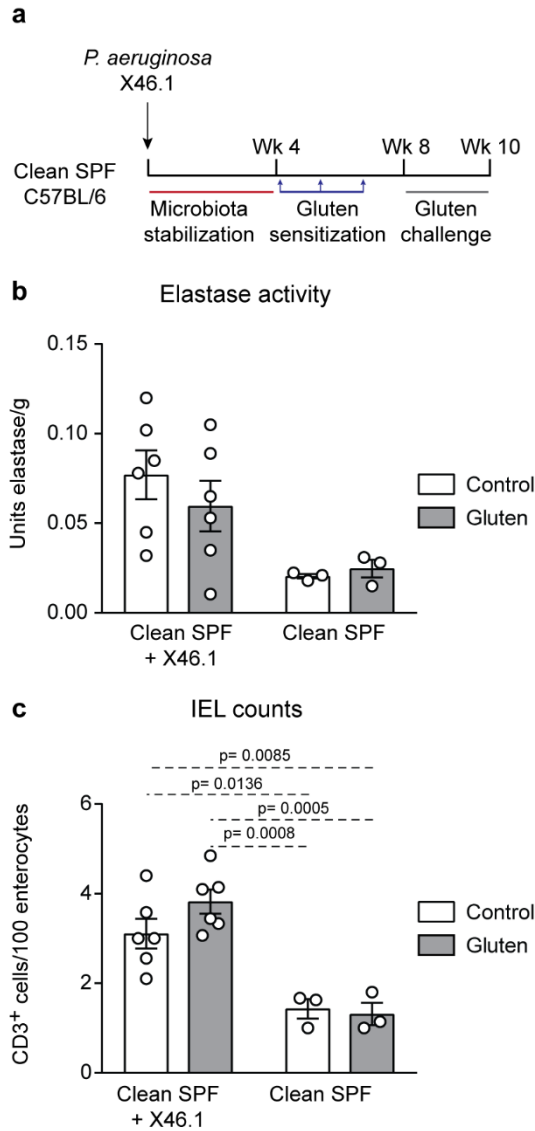

**Supplementary Figure 8.** A clinical *P. aeruginosa* strain isolated from the duodenum of a CeD patient enhances gluten-induced pathology in NOD/DQ8 mice. **a.** Protocol for gluten sensitization and challenge in clean SPF C57BL/6 mice colonized with *P. aeruginosa* X46.1. **b.** Elastase activity measured in the small intestine of clean SPF C57BL/6 mice colonized with *P. aeruginosa* X46.1 treated with gluten (grey bars; n=6 clean SPF + X46.1, n=3 clean SPF) or without gluten (white bars; n=6 clean SPF + X46.1, n=3 clean SPF). **c.** Quantitative measurement of IELs/100 enterocytes in small intestinal villi tips of clean SPF C57BL/6 colonized mice with *P. aeruginosa* X46.1, treated with gluten (grey bars; n=6 clean SPF + X46.1, n=3 clean SPF) or without gluten (white bars; n=6 clean SPF + X46.1, n=3 clean SPF). Data in panels b, c presented as mean  $\pm$  s.e.m. where dots represent individual mice. Displayed p values calculated by one-way ANOVA with Tukey post-hoc test.

## Supplementary References

- 1- Liberati NT, *et al.* An ordered, nonredundant library of *Pseudomonas aeruginosa* strain PA14 transposon insertion mutants. *Proc. Natl. Acad. Sci. U.S.A.* **103**, 2833-2838 (2006).
- 2- Herran AR, *et al.* Gluten-degrading bacteria are present in the human small intestine of healthy volunteers and celiac patients. *Res. Microbiol.* **168**, 673-684 (2017).
- 3- Sibley CD, *et al.* Discerning the complexity of community interactions using a *Drosophila* model of polymicrobial infections. *PLoS pathogens* **4**, e1000184 doi: 10.1371/journal.ppat.1000184 (2008).
- 4- Figurski DH, Helinski DR. Replication of an origin-containing derivative of plasmid RK2 dependent on a plasmid function provided in trans. *Proc. Natl. Acad. Sci. U.S.A.* **76**, 1648-1652 (1979).
- 5- Qiu D, Damron FH, Mima T, Schweizer HP, Yu HD. PBAD-based shuttle vectors for functional analysis of toxic and highly regulated genes in *Pseudomonas* and *Burkholderia* spp. and other bacteria. *Appl. Environ. Microbiol.* **74**, 7422-7426 (2008).
- 6- Mihara K, *et al.* Thrombin-Mediated Direct Activation of Proteinase-Activated Receptor-2: Another Target for Thrombin Signaling. *Mol. Pharmacol* **89**, 606-614 (2016).
